# Supplementary material for: Prokaryotic diversity and community structure in the rhizosphere of Lantana weed (Lantana camara L.)
Source: Front Plant Sci. 2023 Apr 21;14:1174859. doi: 10.3389/fpls.2023.1174859 (PMC10160613; doi:10.3389/fpls.2023.1174859)
Supplement: Supplementary file 2 [file Table_2.xlsx]

## Sheet: prediction_ko
# Constructed from biome file
# KO identifier	Frequency
K01365	0
K01364	5
K01361	2856
K01360	24
K01362	103440
K02249	232
K05841	2364
K05844	11161
K05845	15238
K05846	38153
K05847	25070
K00508	12004
K00500	9375
K00507	27344
K00504	589
K00505	364
K12521	0
K01101	5577
K01103	1065
K12520	0
K01104	70341
K05592	35215
K05593	3312
K05590	135
K05591	3725
K05596	6798
K05597	707
K05594	134
K05595	26399
K05599	12
K11964	0
K11962	1104
K14540	7977
K12529	1042
K12528	0
K06353	6
K02456	34852
K02457	10609
K02454	23043
K02455	16864
K02452	5920
K02453	22470
K02450	2302
K02103	1014
K08138	912
K02108	39192
K02109	54357
K02458	9895
K02459	9389
K08137	83
K03851	107
K03850	0
K03852	255
K03855	5770
K03856	21503
K13018	546
K13019	301
K13010	1593
K13011	135
K13012	3492
K13013	3744
K13014	161
K13015	11703
K13016	206
K13017	914
K08566	0
K08567	1584
K13274	27
K13275	1381
K13276	1284
K13277	6
K03275	1
K03274	7143
K03277	0
K03276	0
K03271	23404
K03270	17234
K03273	16912
K03272	22100
K03279	0
K03278	0
K11022	0
K12277	0
K12276	337
K12270	2
K11058	0
K12279	337
K12278	337
K07557	0
K07550	0
K07552	43416
K06319	35
K09909	145
K09908	184
K12051	0
K12050	0
K12057	3297
K12056	3278
K06221	7134
K09900	1
K09903	40794
K09902	702
K09904	135
K09907	135
K09906	156
K11501	0
K03234	0
K00773	39673
K00772	23121
K00777	615
K00776	0
K06313	3843
K06315	1219
K05574	1115
K10201	1571
K07176	0
K07177	13958
K07174	0
K07175	16595
K07172	7089
K07173	3255
K07170	8559
K07171	25118
K07178	5353
K07179	0
K00195	0
K00194	1977
K00197	2047
K00196	364
K00191	0
K00190	2893
K00193	0
K00192	0
K00198	1476
K06405	6418
K10109	7502
K10108	6715
K10107	6677
K01828	771
K01829	2490
K01826	4324
K01825	2156
K01822	4194
K01823	13083
K01820	4992
K01821	26618
K00999	1109
K00998	32608
K00995	80063
K00997	35251
K00996	1042
K00991	31657
K00990	20788
K00992	2140
K11028	0
K02622	20651
K02625	0
K03564	57770
K13489	1329
K13488	737
K13483	19707
K13482	5411
K13481	5220
K13480	0
K13487	563
K13486	1329
K14680	45
K14681	0
K14682	6942
K08358	153
K08357	137
K08356	80
K08355	80
K03469	44714
K03462	12
K03464	3985
K03465	8727
K03466	62669
K01648	691
K01649	69182
K01643	1230
K01640	30619
K01641	2350
K01646	189
K01647	66114
K01644	80793
K02597	8523
K02626	2784
K02595	4104
K02594	2883
K02593	4058
K02592	4339
K02591	11721
K02590	1207
K02598	1290
K02849	1424
K14061	71
K14062	135
K14063	0
K14064	0
K14065	0
K14067	1504
K02841	6860
K02840	45
K02843	20720
K02844	3393
K02847	1
K02846	0
K02102	106
K09758	905
K06039	2376
K06034	558
K06036	46
K06037	0
K06032	0
K01581	11991
K02702	1085
K02659	6790
K13490	1439
K13491	1329
K03644	40486
K03645	168
K03646	8327
K03647	3492
K03640	24472
K03641	23602
K03642	32696
K03643	12852
K03648	27419
K03649	8744
K06694	1
K11814	6
K12428	566
K12429	1725
K12422	3
K12423	348
K12420	99
K12421	593
K12426	305
K12427	114
K12424	3
K12425	0
K07349	2
K07348	135
K05380	22
K07345	823
K07344	8683
K07347	2447
K07346	1580
K07341	10809
K07340	6878
K07343	6552
K07342	0
K06968	1415
K06969	35446
K06962	8858
K06963	0
K06960	22670
K06961	0
K06966	62944
K06967	3980
K06964	0
K06965	0
K08995	17181
K08994	14790
K08997	270
K08996	139
K08990	4844
K08993	174
K08992	173
K08999	21702
K08998	39357
K08344	606
K08345	0
K08346	0
K14940	0
K02724	1107
K08349	0
K11815	6
K05929	360
K05928	3144
K05927	3
K05924	0
K05922	25
K05921	6426
K00349	656
K00698	111
K00340	45324
K00341	45404
K00690	401
K00343	46650
K00344	91390
K00697	22806
K00346	656
K00347	1020
K09116	418
K09117	36809
K05337	34387
K09118	12025
K09119	0
K02106	3546
K05823	2879
K05820	13910
K05826	1748
K05827	1438
K02100	6
K02101	224
K00524	4
K00525	54819
K00526	23351
K00527	9443
K00520	35358
K00522	0
K00523	6214
K02451	919
K00528	33956
K00529	33519
K00025	73
K14215	349
K14213	0
K03453	18491
K00796	50161
K05339	56
K00027	28632
K00794	42459
K00793	39599
K01347	0
K01346	0
K01344	0
K01343	0
K00791	40643
K01340	0
K00790	47204
K02694	1107
K02696	1107
K02697	1111
K02690	1111
K02691	1107
K02692	1107
K02693	1107
K02698	2218
K02699	1107
K00836	4636
K00837	50658
K00835	1391
K00832	7314
K00833	29934
K00830	52894
K00831	32891
K00839	4005
K04335	672
K04334	0
K01120	2023
K01126	77666
K04333	3
K01129	34459
K01128	252
K04339	6
K04338	663
K02470	48033
K02471	11937
K02472	7534
K02473	0
K02474	8845
K02475	5992
K02476	6792
K02477	31149
K02478	5044
K02479	17977
K09019	5467
K01267	4092
K13074	213
K13075	565
K11441	11
K14055	380
K13299	0
K13292	33355
K14057	56
K14056	26
K02856	1538
K02585	7918
K12211	10
K12210	0
K12213	21
K12212	10
K12215	0
K02854	1245
K12217	435
K12216	10
K12219	10
K12218	435
K02855	317
K08692	1504
K08693	104
K08690	29
K08691	7728
K08696	3295
K08697	1107
K11748	2689
K11749	32778
K11746	435
K11747	5418
K11744	73
K11745	1111
K11742	40
K11743	46
K11740	1210
K11741	36479
K13920	316
K13921	2
K13922	499
K13923	0
K13924	20222
K13925	0
K13926	3896
K13927	36
K13928	581
K13929	4397
K09923	169
K09922	12694
K06201	8466
K06200	18393
K06207	39189
K06206	5479
K06205	213
K09924	7701
K09929	114
K06208	11842
K00759	36166
K00758	11108
K00752	1020
K00757	1865
K00756	10627
K00754	30477
K06001	7895
K05557	187
K09766	4196
K05554	305
K07475	0
K07150	5850
K07151	34
K07152	53307
K07153	1744
K07154	30021
K07155	6
K07156	15743
K07157	21932
K07406	6474
K07407	22911
K07404	7099
K07405	2496
K07402	43304
K07403	14381
K07400	740
K07401	4663
K01808	34538
K01809	42969
K01800	13493
K01801	0
K01802	61690
K01803	43189
K01804	8132
K01805	19116
K01807	16248
K09718	0
K14668	828
K14669	246
K14666	892
K14667	1137
K01664	13069
K01665	19140
K01666	16445
K01667	2441
K01660	0
K01661	16726
K01662	40676
K01663	0
K01668	143
K01669	35383
K02863	40607
K02862	4690
K02860	37298
K02867	40642
K02866	0
K02864	40607
K02869	0
K05362	1282
K05365	9854
K03402	18091
K03403	3735
K03400	0
K03406	220116
K03407	52497
K03404	13362
K03405	16957
K03408	68737
K03409	9640
K02315	5365
K02314	46017
K02317	0
K02316	40712
K02313	43467
K02312	6394
K02319	700
K12405	0
K12152	135
K12151	0
K07091	10627
K07090	146583
K07093	25525
K07092	105
K07095	21611
K07094	6504
K07097	970
K07096	1239
K07099	1701
K07098	38082
K11175	40539
K11174	0
K11177	22309
K11176	0
K11173	222
K11179	6482
K11178	20998
K00322	6391
K00320	12908
K00321	0
K00326	0
K00324	42060
K00325	25338
K00329	3692
K05945	0
K05944	4
K05947	4
K05946	19520
K06944	1272
K06945	11870
K06946	5393
K06415	9799
K06940	15664
K06941	44058
K06942	40617
K06943	0
K10806	10722
K10807	195
K10804	22681
K10805	17905
K06948	3860
K06949	36521
K06418	2991
K09138	381
K09139	10
K09134	10568
K09135	0
K09136	14048
K09137	8509
K09130	0
K09131	22980
K09132	766
K09133	740
K05808	23633
K05809	135
K05804	144
K05805	7195
K05806	0
K05807	19668
K05800	14055
K05801	5326
K05802	331
K05803	812
K01044	5462
K01045	4
K01046	18175
K02068	3378
K04561	7428
K01042	18809
K05568	21228
K05567	18961
K14273	0
K14275	0
K14274	0
K02062	664
K05245	0
K05564	4359
K01048	10607
K02066	67889
K01322	24602
K01325	0
K02065	48138
K01326	111
K05560	4359
K02243	2647
K08930	2382
K02679	135
K02676	5556
K02674	6700
K02675	0
K02672	5812
K02241	1120
K02670	9120
K02671	6361
K00810	83
K00811	725
K00812	38269
K00813	464
K00814	0
K00817	77178
K00818	25236
K00819	15138
K02530	43
K02245	2961
K02244	2618
K01499	3539
K01498	0
K01493	9263
K01492	9
K01491	94587
K01497	31176
K01496	28525
K01495	45643
K01494	31452
K02418	12767
K02419	29032
K14492	0
K02412	27900
K02413	10679
K02410	29654
K02411	24748
K02416	27366
K02417	34062
K02414	7356
K02415	26068
K00120	45
K00121	59684
K00430	0
K13058	237
K13059	1
K13727	307
K13057	1508
K13722	0
K13051	5873
K13052	4361
K00435	3111
K12054	0
K03239	0
K03238	0
K03231	20
K03230	2898
K03232	0
K12059	3140
K03237	0
K03236	0
K12058	3144
K12239	4
K12238	4
K12235	0
K12234	21871
K13942	0
K13940	1172
K13941	5
K12097	0
K12096	0
K12095	0
K12094	0
K12093	0
K12092	0
K12091	0
K12090	0
K12099	0
K12098	0
K06356	6
K05992	22
K03540	111
K06331	123
K06330	1328
K07138	1392
K07139	8433
K11811	5505
K07132	1521
K07133	20727
K07130	33487
K07131	13566
K07137	14197
K07134	0
K07135	0
K01860	0
K01866	43400
K01867	43527
K01865	774
K01868	42826
K01869	40372
K06140	11510
K04766	3852
K04767	8439
K04764	18183
K04762	18569
K04763	53860
K04760	12227
K04761	18234
K04768	13764
K04769	4754
K08313	168
K08312	1611
K08311	14226
K08310	4917
K08317	136
K08316	22297
K08315	700
K08314	49
K05149	3
K08319	135
K08318	7
K06339	6
K14648	0
K14392	3711
K14393	29101
K14645	5820
K14647	1923
K01689	42189
K01686	7832
K01687	71125
K01684	7204
K01685	13563
K01682	6803
K01681	41239
K05308	0
K02889	0
K02888	38388
K02885	0
K02884	40616
K02887	40611
K02886	40615
K02881	40581
K02883	0
K13743	0
K02086	3878
K02081	14796
K02080	0
K02083	6901
K02082	926
K13831	456
K03428	2503
K03429	5468
K03424	52559
K03935	0
K03932	8187
K03933	5718
K03930	39
K03931	1
K02339	13157
K02338	43017
K02337	41410
K02336	480
K02335	45672
K02334	37975
K02330	523
K03688	27337
K03689	1085
K03680	160
K03683	1723
K03684	34409
K03685	39754
K03686	58406
K03687	43122
K07301	18823
K07300	14005
K07303	28641
K07302	34048
K07305	43161
K07304	53522
K07307	1021
K07306	246
K07309	0
K07308	2716
K02617	338
K02610	10098
K02963	41022
K02612	12311
K02961	40628
K09686	148738
K09687	216052
K09684	25863
K09685	4290
K09682	2608
K09683	1272
K09680	1980
K09681	2059
K09688	4270
K09689	4217
K05962	3443
K05961	1013
K05967	3689
K05966	3670
K11159	5297
K05964	206
K05968	145
K11152	0
K00309	746
K00658	38548
K00304	8974
K00305	8383
K00654	0
K00655	89290
K00652	26299
K00301	17662
K00302	13797
K00303	28150
K10828	36
K06431	1642
K06432	1653
K06433	1706
K06434	3652
K06436	3084
K06437	6
K10820	535
K06439	1604
K10822	0
K10823	0
K10826	3016
K09167	14892
K06322	56
K14117	0
K14259	0
K14257	182
K01308	3221
K01303	361
K01301	5006
K01305	1335
K01304	10266
K02658	13707
K00672	3465
K02650	18351
K02651	32123
K02652	35570
K02653	30732
K02654	72293
K05687	0
K02656	4859
K05685	2589
K00878	5987
K00879	8
K00872	21791
K00873	45124
K00870	1084
K00876	16994
K00877	0
K00874	24747
K00875	813
K04487	74908
K04486	12325
K04485	36967
K04484	0
K04483	0
K04482	0
K04480	19
K04488	33036
K12049	0
K13693	5900
K13706	0
K13694	442
K13695	161
K05977	102
K09516	2744
K02434	79138
K02435	78782
K02436	0
K02437	43700
K05350	33484
K02431	4661
K08100	1021
K02433	157046
K02438	38866
K02439	183
K03745	8935
K03744	36537
K03747	4697
K03210	34253
K03217	46166
K03216	25634
K03215	20431
K03742	21432
K03219	416
K03218	39165
K03749	3435
K03748	585
K02383	1
K06327	2572
K06320	57
K07238	26691
K09479	1
K09478	4
K09475	0
K09474	5305
K09477	0
K09476	135
K09471	4478
K09470	1
K09473	0
K09472	2764
K07543	58
K06898	17220
K13967	646
K13963	4825
K07545	0
K00737	237
K05345	1035
K11706	0
K11707	4094
K11704	0
K11705	0
K11708	4101
K11709	4112
K05588	246
K07114	81383
K07443	8712
K07116	3811
K07117	16655
K07110	12899
K07447	39044
K07112	38994
K07113	15160
K07448	7836
K07118	9897
K07119	23161
K10619	2552
K10618	38
K10617	13
K10616	686
K01848	18192
K01849	16258
K01844	4979
K01845	54310
K01846	1733
K01847	34241
K01840	63110
K01841	4634
K01842	34
K01843	17282
K06219	475
K10832	0
K05348	52
K14203	0
K08483	29306
K08482	14144
K08481	3877
K08480	1107
K08485	145
K08484	8397
K00464	1223
K00467	1859
K00466	2147
K00461	111
K00460	0
K00463	0
K00462	5969
K04509	65
K00469	252
K00468	446
K08645	0
K04744	15929
K01518	55
K01519	0
K04748	6971
K04749	28815
K01514	4634
K01515	35244
K01512	26902
K01510	0
K14623	2466
K14626	41
K14627	0
K14628	103
K14629	68
K03918	1052
K03919	7021
K12372	2133
K12373	14017
K12370	2133
K12371	2211
K02359	0
K02358	58113
K02351	7197
K02352	6
K02355	74006
K02357	40629
K02356	47087
K13574	5283
K13573	4931
K13572	10066
K13571	10095
K13570	9126
K12112	1
K12113	0
K12110	0
K12111	279
K07329	0
K07328	0
K07323	12944
K07322	5494
K07321	5370
K07320	6761
K07327	0
K07326	253
K07325	0
K07324	0
K08163	1
K06180	66685
K06181	8713
K06182	8623
K06183	14490
K06186	4870
K06187	40642
K06188	17231
K06189	5560
K08359	24
K07589	173
K07588	32739
K07587	0
K07586	7566
K07585	0
K07584	4936
K07583	0
K07582	0
K07581	0
K07580	0
K11139	0
K05989	9344
K05988	0
K05985	4033
K05987	0
K05986	797
K10843	11832
K08354	748
K10844	699
K10848	429
K00673	4581
K00674	28839
K00675	6978
K00676	16583
K00677	25755
K06988	28534
K06989	2296
K08351	535
K06980	28402
K06981	230
K06982	0
K08350	135
K06984	44
K06985	14594
K06986	7645
K06987	9083
K02445	2051
K02444	7870
K00582	0
K00583	0
K00580	0
K02110	39606
K00586	0
K00587	632
K00584	14
K08921	0
K02441	1991
K00588	11711
K08922	0
K02440	15438
K00018	4939
K08923	0
K02443	6037
K00019	24145
K02442	35
K08925	0
K08926	1214
K08927	1214
K03149	37069
K06604	0
K00015	21341
K01989	23551
K00854	36447
K00855	10934
K00856	9781
K00857	16211
K00850	43617
K00851	28394
K00852	29085
K00853	6144
K00858	44756
K00859	40332
K01181	21997
K01180	86
K01183	20230
K01182	3761
K01185	4405
K01184	1929
K01187	48453
K01188	13817
K02596	5985
K13766	8505
K13767	3462
K13003	0
K13002	186
K13000	0
K02984	0
K02986	41607
K02987	0
K02636	4555
K02982	40615
K02983	0
K02638	1106
K02639	5676
K02988	40615
K08298	0
K08299	2559
K03583	9038
K03582	6868
K03581	28203
K03580	3267
K03587	34665
K03586	4871
K03585	32224
K03584	40430
K03589	34969
K03588	43343
K01725	5832
K01724	34988
K01727	1210
K01726	5504
K01721	14474
K01720	6515
K01722	0
K13008	0
K01729	393
K01728	6447
K09530	0
K09539	0
K02188	9781
K02189	11629
K02182	11239
K02183	0
K03769	21271
K03768	36754
K03767	23530
K03765	0
K03764	135
K03763	6647
K03762	11020
K03761	10640
K03760	4050
K09457	25390
K09456	11496
K09459	2422
K09458	87114
K00602	81932
K13988	92
K13985	1
K09981	5838
K09980	344
K09983	6603
K09982	1628
K09985	8690
K09984	4420
K09987	8012
K09986	7643
K09989	11609
K09988	299
K12583	4876
K12582	153
K12589	0
K11720	14027
K09759	1759
K10985	5
K10984	17
K07468	366
K07469	0
K07464	8337
K07465	9742
K07466	20
K07467	99
K07460	37627
K07461	19857
K07462	31988
K07463	20
K10679	854
K10678	730
K10671	58
K10670	426
K10673	372
K10672	189
K10674	2626
K10677	2228
K10676	2167
K08726	14
K08724	3548
K08722	354
K08723	1
K08720	636
K08721	29
K08728	37
K10187	421
K00119	13244
K00118	4508
K00449	10521
K00448	7007
K00115	23
K00446	11751
K00117	18063
K00116	9702
K00111	46782
K00442	0
K00113	1023
K00112	472
K01539	7
K01531	4412
K04720	5638
K01533	74611
K01534	49441
K01535	1155
K01537	21810
K14358	0
K14605	1104
K14606	1107
K00413	10523
K10120	18
K05600	12
K05777	2368
K03972	169
K03973	6098
K03970	2840
K03971	0
K03976	7168
K03977	40632
K03974	2374
K03975	23218
K03978	25538
K03979	40619
K13378	840
K02372	44201
K02371	8424
K02377	17601
K02379	31977
K03396	2158
K03397	0
K03394	34580
K03395	14
K03392	11550
K03393	0
K03390	1555
K03391	4114
K03399	880
K03027	0
K12136	0
K12137	1359
K06610	155
K12138	2
K12139	681
K11444	447
K11440	12
K11443	10686
K11442	0
K00612	15069
K00613	785
K00610	611
K00611	28269
K00616	42464
K00617	0
K00614	891
K00615	74999
K00619	14884
K10863	0
K07874	0
K06234	0
K10240	4304
K10241	3683
K10242	3362
K10243	7408
K04110	2383
K04113	587
K04112	587
K04115	587
K04114	587
K04117	1291
K04116	2016
K04118	1
K05517	161
K07705	3239
K07704	4644
K07707	121
K07706	96
K07701	134
K07700	135
K07703	134
K07702	135
K07709	1787
K07708	12865
K01955	52214
K13042	375
K09934	3379
K09935	9048
K06216	0
K09937	8632
K13745	3575
K13746	0
K13747	4898
K13740	0
K13741	0
K13742	0
K06211	1659
K06212	1306
K09933	6037
K02618	3758
K02619	10928
K02968	40492
K02966	0
K02967	40605
K02616	18105
K02965	40623
K02962	0
K02611	12810
K02613	9492
K03569	42297
K03568	35570
K03565	26481
K06218	4001
K03567	2778
K03566	33358
K03561	56980
K03560	5433
K03563	21631
K03562	25191
K06430	6
K01709	8754
K01708	3879
K01707	6300
K01706	7203
K01705	11
K01704	88460
K01703	90203
K01702	0
K14165	2204
K14164	214
K14166	6559
K14161	22219
K14160	10963
K14162	27808
K05396	8952
K03709	22009
K03708	4236
K08160	199
K03701	63016
K03700	2777
K03703	41428
K03702	40624
K03705	35106
K03704	132720
K03707	14009
K03706	4838
K06289	0
K06288	27
K06283	4240
K06282	9202
K06281	8088
K06287	54830
K06286	2372
K06285	4037
K06284	5092
K08161	1526
K07540	17
K06438	3899
K06869	0
K06868	0
K06867	17777
K06866	135
K06865	0
K06864	13458
K06863	0
K06862	6
K06861	25000
K06860	9468
K12659	824
K12658	2022
K07547	0
K07546	0
K15023	1047
K15022	372
K15020	0
K15024	4428
K08700	1107
K08162	849
K07544	0
K00137	771
K00135	75783
K00134	50922
K00133	44887
K00132	621
K00131	6788
K00130	44135
K00139	0
K00138	0
K00429	6351
K00428	32109
K00421	763
K00423	955
K00425	43151
K00427	630
K00426	41829
K14292	0
K14379	0
K14370	66
K14371	192
K14372	5
K14373	5
K14374	53
K14375	374
K09845	1736
K14082	0
K14083	3462
K14080	0
K14081	0
K14086	1
K14087	1
K14084	35
K14088	11
K14089	38
K01552	20636
K01551	17768
K01556	19024
K01557	207
K01554	1308
K01555	14990
K04708	59
K03955	0
K13689	0
K13688	996
K13683	0
K13685	9740
K13684	0
K13687	807
K13686	431
K14159	22
K02399	2552
K02398	12803
K02395	7994
K02394	19759
K02397	26104
K02396	29894
K02391	13343
K02390	31390
K02393	19787
K02392	38711
K13533	1690
K13532	933
K13531	2839
K13530	3113
K01550	5
K05658	0
K14054	2395
K02601	41538
K02970	33213
K05378	11
K12339	16461
K14060	419
K11687	2
K11686	1645
K11685	0
K11689	6764
K11688	9261
K08939	2382
K03048	3859
K03049	0
K13821	36826
K13820	83
K03042	0
K03043	40577
K03040	42988
K03041	0
K03046	43922
K03047	0
K03044	0
K03045	0
K00348	1020
K09847	47
K00692	3287
K00638	4837
K00639	20170
K00693	97
K00634	2882
K00635	9667
K00630	0
K00631	2637
K00632	49805
K00633	608
K00691	67
K00696	863
K00694	11844
K00695	1112
K10854	658
K07811	0
K07810	256
K07813	1442
K07812	7303
K07814	16098
K07816	4459
K00090	3464
K00091	17659
K00094	46
K00096	1815
K00097	29987
K00098	5622
K00099	38962
K10228	5666
K10229	5591
K12548	240
K10222	446
K10220	3026
K10221	2485
K10227	6242
K05822	2772
K01949	0
K01945	41062
K01947	0
K01946	0
K01941	4155
K01940	40940
K06357	0
K07729	16335
K07728	0
K07727	11991
K07726	11640
K07725	0
K07724	406
K07723	3348
K07722	7699
K07721	11
K07720	10232
K00899	5163
K05824	69
K00891	40034
K00892	1
K00895	7807
K00897	1214
K08151	7914
K08153	7630
K08154	11
K02948	40533
K02942	0
K02944	0
K05665	0
K02946	40714
K13793	0
K06352	6
K01769	27
K01768	100520
K01761	14672
K01760	23860
K01762	0
K09578	0
K01766	174
K08164	5284
K02493	44760
K08166	1744
K08167	14217
K02496	4663
K02497	3853
K02494	4663
K02495	64550
K02498	10627
K02499	6270
K08168	1621
K08169	3986
K14415	1302
K14414	1700
K06881	21830
K00436	3343
K06332	2911
K12815	0
K12810	0
K06885	11242
K00437	69
K06335	55
K06334	3639
K03547	21009
K03546	23200
K03545	40630
K03544	41485
K03543	35807
K06888	24912
K10941	1330
K03549	21805
K03548	204
K10940	0
K02236	5922
K02237	26586
K02234	8138
K02232	30547
K02233	29111
K02230	20184
K02231	52850
K06359	6
K02238	44443
K02239	2880
K03723	42548
K03722	34329
K03721	413
K03720	140
K03727	10046
K03726	693
K03725	0
K03724	32647
K06358	0
K12673	10
K12679	0
K12678	0
K06410	4791
K11898	1139
K11899	159
K11896	7869
K11897	4697
K11894	711
K11895	6498
K11892	7934
K11893	11210
K11890	2172
K11891	7869
K08762	117
K08764	4
K08765	0
K10418	0
K11325	1497
K11326	0
K11327	0
K11328	0
K11329	2591
K00151	5894
K00150	1114
K00153	5414
K00400	0
K00407	8991
K00406	15610
K00405	13335
K00404	13557
K00158	263
K01342	2295
K09388	2396
K09386	17133
K09384	892
K04094	21123
K04095	728
K04096	45264
K04097	16281
K04090	14157
K04091	35864
K04092	5907
K04093	1292
K04098	1242
K04099	1393
K01578	6042
K01579	29028
K01574	6083
K01575	2847
K01576	3798
K01577	3540
K01571	2467
K01572	4229
K01573	116
K02009	2448
K02008	48097
K02005	56058
K02004	228955
K02007	14998
K02006	55815
K02001	13926
K02000	13310
K02003	179542
K02002	18201
K03065	0
K08952	11
K03060	35789
K13809	0
K10948	0
K09607	5429
K06125	1
K04337	0
K06120	0
K06121	0
K04336	0
K01127	5
K09703	8911
K00004	3250
K14699	224
K09702	4865
K14698	224
K05311	4202
K13829	9660
K10943	4250
K07291	348
K07290	3352
K10206	10186
K10202	1640
K10208	0
K10209	397
K01966	38899
K01965	18178
K01964	6
K01963	38051
K01962	30697
K01961	78269
K01960	3895
K01969	19497
K01968	13724
K07749	46570
K07748	2198
K07741	574
K07740	184
K07743	291
K07742	20438
K07745	0
K07744	0
K07746	11231
K01299	11134
K01295	20349
K01297	20608
K02922	0
K05603	2760
K02921	0
K02926	40615
K05607	4
K02924	0
K05605	0
K02928	0
K02929	0
K00216	4297
K00217	2408
K00214	26
K00215	47304
K00213	0
K00210	2817
K00211	0
K00218	2034
K00219	7437
K01035	1985
K01034	5034
K04517	33781
K01740	44014
K01031	4603
K01746	248
K01745	30108
K01744	16556
K01749	40555
K01039	9908
K04518	29097
K09591	0
K14129	3
K14128	987
K14121	0
K14120	0
K14123	0
K14122	0
K14125	0
K14124	0
K14127	1468
K14126	1070
K03521	50414
K03520	22251
K03523	22918
K03522	50869
K03525	34604
K03524	43083
K03527	42534
K03526	39272
K03529	39139
K03528	841
K06338	740
K02217	3176
K03299	9341
K03298	4403
K13472	36
K03293	20924
K03292	6569
K03291	847
K03290	29
K03297	23095
K03296	101567
K03295	40412
K03294	68161
K13009	679
K12690	0
K09743	0
K06022	24
K07190	1351
K06021	541
K07192	11660
K06020	4376
K06027	363
K06026	11
K09744	3212
K07991	0
K08749	0
K09835	1113
K09834	1107
K10439	57611
K06351	2651
K09833	1107
K10925	0
K10924	1434
K10927	337
K10926	337
K10923	0
K10922	0
K09629	3
K10697	1107
K00179	7982
K00172	4450
K00171	1388
K00170	4809
K00177	3749
K00176	7464
K00175	24472
K00174	24419
K13478	0
K14338	7026
K14339	3345
K14335	5510
K14337	1045
K14330	1107
K14331	1107
K14333	1015
K08918	0
K13479	205
K04078	59410
K04079	24729
K04076	2880
K04077	63306
K04074	8133
K04075	38226
K04072	9427
K04073	12940
K04070	1901
K04071	0
K14597	418
K13318	32
K08280	26
K13641	17689
K13640	15604
K13643	8098
K13642	405
K02027	180496
K02026	190762
K02025	191504
K02024	2861
K02023	49969
K02022	32112
K02021	9311
K02020	44856
K02029	88293
K02028	54644
K03886	7669
K03887	4645
K03884	0
K03885	54214
K03881	0
K03888	3942
K03889	7352
K12998	0
K12999	0
K12992	190
K12993	127
K12990	919
K12991	27
K12996	6
K12997	12
K12994	778
K12995	1616
K08979	0
K08978	9067
K03088	612229
K03089	20976
K03086	70082
K03087	10649
K08971	0
K08970	4930
K03082	5087
K03080	134
K08974	2035
K13868	0
K00918	50
K01553	0
K12214	15
K11646	110
K11645	0
K11641	1219
K11640	1219
K12736	0
K12733	0
K07507	30011
K07506	21772
K07505	344
K07504	1155
K07503	7865
K07502	6865
K07501	2741
K07500	0
K07509	0
K07508	949
K11422	0
K08698	1107
K10773	44457
K10774	5
K14286	179
K10778	14563
K14287	3988
K00140	76943
K05501	3222
K01903	37242
K01902	37032
K01905	925
K01904	298
K01907	12728
K01906	4211
K01909	243
K01908	13401
K14534	1150
K00147	40188
K07767	0
K07769	1107
K07768	9515
K06203	7818
K06202	5320
K09921	5865
K09920	858
K09927	13498
K09024	3732
K09022	142
K09023	839
K09020	3531
K09021	846
K02908	0
K02909	43225
K08218	19697
K08219	134
K02904	40230
K02906	40607
K02907	36083
K02902	41958
K00230	5551
K00231	24836
K00232	4742
K08976	8630
K00234	0
K00239	46973
K06209	4088
K09928	10831
K01015	1
K01014	1750
K01012	39566
K01011	109307
K01010	0
K08920	0
K14103	0
K14102	0
K14101	0
K14100	0
K14105	0
K14104	0
K14109	0
K14108	0
K06401	2863
K00893	0
K13402	0
K12858	0
K03503	7378
K03502	11851
K03501	39639
K03500	50187
K08924	0
K02278	13823
K02279	21653
K12977	0
K02276	50314
K02277	4587
K02274	65110
K02275	58259
K13450	0
K13451	0
K13452	0
K13454	0
K13455	0
K12509	0
K12508	9225
K12507	200
K12506	20008
K12500	987
K12503	7511
K05926	0
K09728	0
K14587	0
K06597	524
K06596	8379
K06595	4263
K06599	333
[truncated: 4,911 more rows]
